# Supplementary material
Source: PubMed Central journal article supplement (PMC3266606)
Supplement: NIHMS342153-supplement-1.pdf [file NIHMS342153-supplement-1.pdf]

## SUPPLEMENTAL MATERIAL

### **Site representatives at investigative sites of the PProFESS Imaging Substudy where at least one patient was recruited:**

Argentina (Conrado Estol, Miguel Garrote, María Esnaola y Rojas, Sebastián Ameriso, Raúl Rey, Pablo Leonardo Ioli, Juan José Cirio, Gustavo Angel Saredo), Australia (Christopher Bladin, Stephen Davis) Canada (David Howse, James Scott, Jaime Silva), China (Xiaojiang Sun, Ling Miao, Wei Li, Liying Cui, Haibo Chen, Weiwei Zhang, Lijuan Wang, En Xu, Qing Di, Yan Liu), Germany (Jörg Glahn, Dietmar Schneider, Peter Ringleb, Wolfgang Steinke, Lutz Harms, Andreas Hetzel, Michael Rosenkranz), Mexico (Carlos Cantu, Jorge Villarreal), South Korea (Byung Woo Yoon, Byung Chul Lee, Ki Hyun Cho, Ji Hoe Heo, Joung Ho Rha, Hyo Suk Nam, Sun Uck Kwon), Taiwan (Sien-Tsong Chen, Jiann-Shing Jeng, Helen L Po, Ming-Hong Chang, Ku-Chou Chang, Li-Ming Lien, Chung Y. Hsu), USA (Clinton Wright, Daniel Hanley, Jeffery Kramer, Donald Tamulonis, Joseph Weissman, Bret Haake, Steve Moon, Scott Silliman, Pierre Fayad, Erfan Albakri).
